# Supplementary material for: Synthesis, characterization, and photoluminescence properties of three two-dimensional lanthanide-containing Dawson-type polyoxometalates
Source: Royal Society of Chemistry journal article supplement (doi:10.1039/c9dt02710f), 2019-01-01
Supplement: c9dt02710f1.pdf [file c9dt02710f1.pdf]

## <Supporting Information>

# Synthesis, characterization, and photoluminescence properties of three two-dimensional lanthanide-containing Dawson-type polyoxometalates†

Hechen Wu†, Minna Zhi†, Chunli Chen, Yanhong Zhu, Pengtao Ma\*, Jingping Wang and Jingyang Niu\*

*Henan Key Laboratory of Polyoxometalate Chemistry, College of Chemistry and Chemical Engineering, Henan University, Kaifeng, Henan 475004, P. R. China*

### Materials and Methods.

Fig. S1. The experimental and simulated PXRD patterns of **1–3**.

Table S1 selected bond length of **1–3**.

Fig. S2. The packing arrangement of 2D network architecture of **1**.

Table S2 BVS results of Ce ions in **2**.

Fig. S3 IR spectroscopy of **1–3**.

Fig. S4 The UV absorption spectra of **1–3**.

Fig. S5. The emission spectra of **1** ( $\lambda_{\text{ex}} = 448 \text{ nm}$ ).

Fig. S6 TGA curves of **1–3**.

**Materials and Methods.** All reagents used were of analytical grade and obtained from commercial sources without further purification.  $\text{Na}_{12}[\text{P}_2\text{W}_{15}\text{O}_{56}]\cdot 24\text{H}_2\text{O}$  was prepared according to the literature and conformed by IR spectroscopy. Elemental analyses of C, H, and N were performed with an Elementar VarioElcube CHNS analyzer. IR spectroscopy were recorded on a Bruker VERTEX 70 IR spectrometer using KBr pellets in the range of  $4000\text{-}400\text{ cm}^{-1}$ . PXRD data were obtained on a Bruker AXS D8 Advance diffraction meter with Cu  $K\alpha$  radiation ( $\lambda = 1.5418\text{ \AA}$ ) at room temperature. The TGA curves were performed under flowing  $\text{N}_2$  atmosphere using a Mettler-Toledo TGA/SDTA 851e heat analysis meter with a heating ratio of  $10\text{ }^\circ\text{C min}^{-1}$  from 25 to  $800\text{ }^\circ\text{C}$ . Raman spectra were performed on a Renishaw in Via with a red Spectra-Physics He-Ne laser (wavelength of  $532\text{ nm}$  and  $500\text{ mW}$  capacity). The UV/vis diffuse reflectance spectra and UV absorption spectra were performed on a UH4150 UV-vis spectrometer.

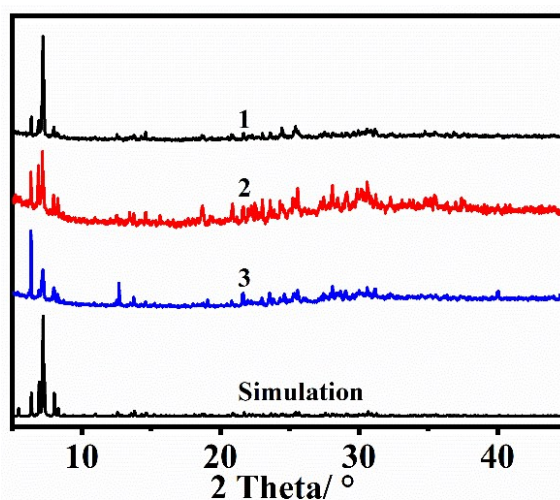

Fig. S1. The experimental and simulated PXRD patterns of **1–3**.

Table S1 selected bond length of **1–3**

| La–O    | Bond length (Å) | Ce–O    | Bond length (Å) | Pr–O    | Bond length (Å) |
|---------|-----------------|---------|-----------------|---------|-----------------|
| La1-O1W | 2.60(3)         | Ce1-O27 | 2.54(2)         | Pr1-O27 | 2.48(3)         |
| La1-O2W | 2.61(3)         | Ce1-O28 | 2.52(3)         | Pr1-O28 | 2.49(3)         |
| La1-O3W | 2.57(4)         | Ce1-O33 | 2.52(4)         | Pr1-O33 | 2.48(4)         |
| La1-O4W | 2.76(4)         | Ce1-O40 | 2.43(3)         | Pr1-O40 | 2.45(3)         |
| La1-O27 | 2.52(3)         | Ce1-O64 | 2.63(4)         | Pr1-O64 | 2.70(3)         |
| La1-O28 | 2.50(3)         | Ce1-O1W | 2.58(4)         | Pr1-O1W | 2.54(5)         |
| La1-O33 | 2.53(3)         | Ce1-O2W | 2.55(4)         | Pr1-O2W | 2.49(5)         |
| La1-O40 | 2.48(3)         | Ce1-O3W | 2.55(4)         | Pr1-O3W | 2.52(4)         |
| La1-O64 | 2.61(3)         | Ce1-O4W | 2.66(5)         | Pr1-O4W | 2.63(5)         |
| La2-O5W | 2.63(3)         | Ce2-O16 | 2.62(3)         | Pr2-O16 | 2.57(3)         |

|          |           |          |           |          |           |
|----------|-----------|----------|-----------|----------|-----------|
| La2-O6W  | 2.62(4)   | Ce2-O76  | 2.49(3)   | Pr2-O76  | 2.45(4)   |
| La2-O7W  | 2.64(3)   | Ce2-O79  | 2.45(3)   | Pr2-O79  | 2.41(3)   |
| La2-O16  | 2.58(3)   | Ce2-O83  | 2.46(3)   | Pr2-O83  | 2.43(4)   |
| La2-O76  | 2.50(3)   | Ce2-O87  | 2.37(4)   | Pr2-O87  | 2.38(4)   |
| La2-O79  | 2.44(3)   | Ce2-O5W  | 2.56(5)   | Pr2-O5W  | 2.60(5)   |
| La2-O83  | 2.48(3)   | Ce2-O6W  | 2.57(5)   | Pr2-O6W  | 2.60(5)   |
| La2-O87  | 2.43(3)   | Ce2-O7W  | 2.54(4)   | Pr2-O7W  | 2.55(5)   |
| La3-O4   | 2.55(3)   | Ce3-O4   | 2.55(3)   | Pr3-O4   | 2.57(3)   |
| La3-O8W  | 2.46(5)   | Ce3-O17  | 2.53(3)   | Pr3-O17  | 2.54(3)   |
| La3-O9W  | 2.55(4)   | Ce3-O8W  | 2.43(5)   | Pr3-O8W  | 2.49(5)   |
| La3-O10W | 2.56(4)   | Ce3-O9W  | 2.57(4)   | Pr3-O9W  | 2.52(4)   |
| La3-O11W | 2.51(5)   | Ce3-O10W | 2.54(4)   | Pr3-O10W | 2.47(5)   |
| La3-O12W | 2.42(4)   | Ce3-O11W | 2.62(4)   | Pr3-O11W | 2.52(4)   |
| La3-O13W | 2.46(4)   | Ce3-O12W | 2.44(3)   | Pr3-O12W | 2.42(4)   |
| La3-O14W | 2.59(3)   | Ce3-O13W | 2.47(4)   | Pr3-O13W | 2.45(3)   |
| La3-O17  | 2.49(3)   | Ce3-O14W | 2.54(3)   | Pr3-O14W | 2.58(4)   |
| Average  | 2.542 (4) | Average  | 2.528 (4) | Average  | 2.513 (4) |

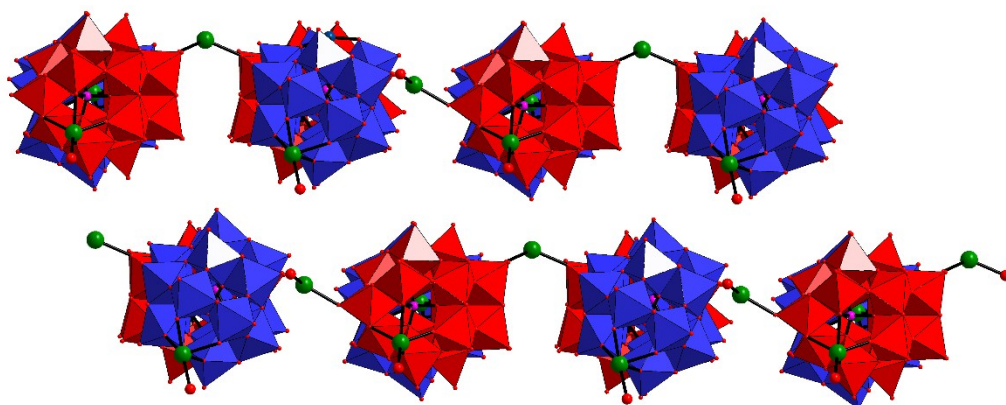

Fig. S2. The packing arrangement of 2D network architecture of **1**.

Table S2 BVS results of Ce ions in **2**

|     | BVS  |
|-----|------|
| Ce1 | 3.07 |
| Ce2 | 3.23 |
| Ce3 | 3.34 |

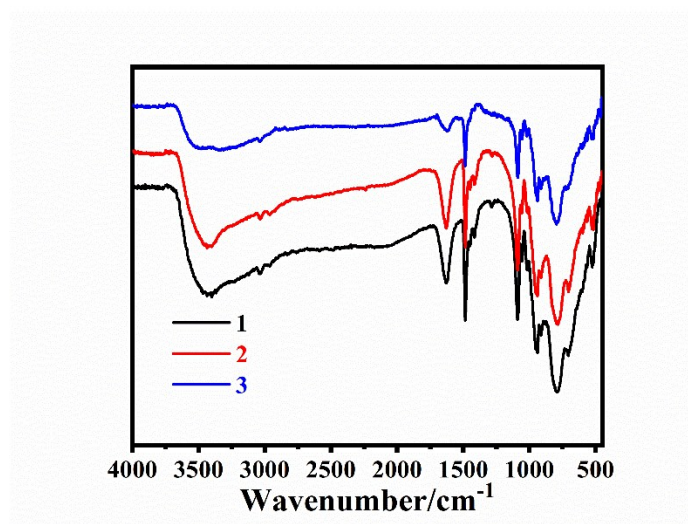

Fig. S3 IR spectroscopy of 1–3.

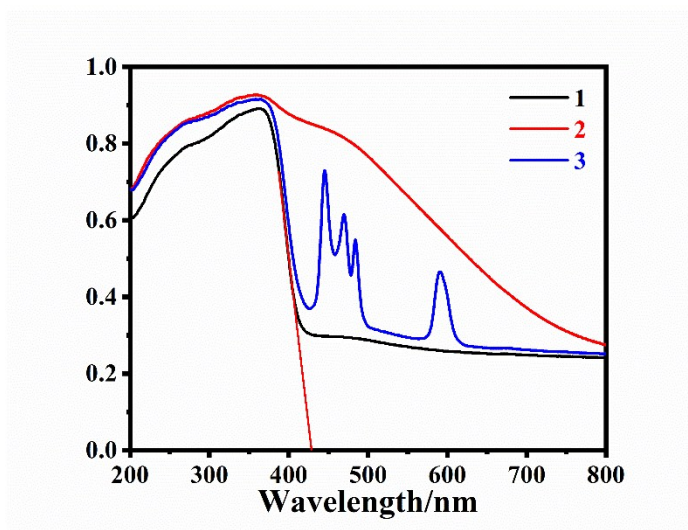

Fig. S4 The UV absorption spectra of 1–3.

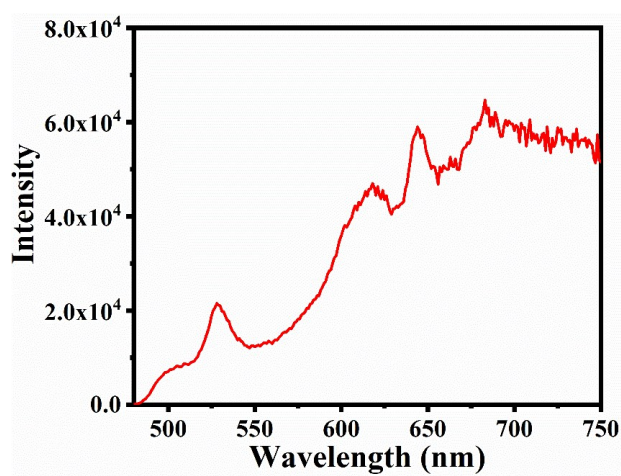

Fig. S5. The emission spectra of 1 ( $\lambda_{\text{ex}} = 448 \text{ nm}$ ).

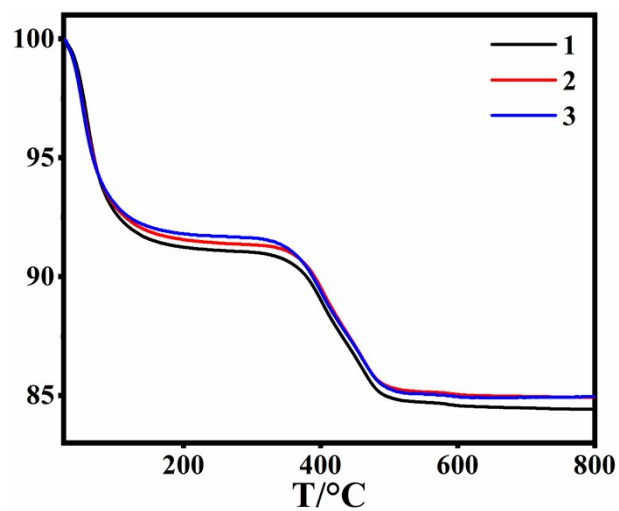

Fig. S6. TGA curves of **1–3**.

As shown in Fig. S6, the similar TGA curves of compound **1–3** show two steps of weight loss from 25 °C to 800 °C. In detail, the first experimental loss of 8.57% can be assigned to the loss of forty-eight lattice water (Cal. 8.53%), and the second experimental loss of 6.49% can be attributed to the loss of fourteen coordination water, three  $[\text{N}(\text{CH}_3)_4]^+$  cations, and partial decompose of POM skeleton.
